# Supplementary material for: Co-designing Online Exercise Strategies to Enhance Engagement Among Cancer Survivors: A Participatory Study Applying Identity Leadership Theory and Introducing the SIGN Framework
Source: Research Square preprint supplement (doi:10.21203/rs.3.rs-7005515/v1), 2025-08-17
Supplement: Supplementary file 2 [file 6ad4f77d3562d1d1c90dc025.docx]

**Initial coding**

|  |  |  | On a scale from 0 (not at all) to 100 (to a great extent), please rate how much you agree that the following strategies would help you **feel committed to the online exercise group.** | | | | | | | On a scale from 0 (not at all) to 100 (to a great extent), please rate how much you agree that  the following strategies would **appeal to you.** | | | | | |
| --- | --- | --- | --- | --- | --- | --- | --- | --- | --- | --- | --- | --- | --- | --- | --- |
|  |  | SIGN | Mean | SD | Median | Min | | | Max | Mean | SD | Median | | Min | Max |
|  | Identity Entrepreneurship | | | | | | |  | | | | | | | |
| 1 | Build trust within the group to make people feel comfortable sharing their struggles or concerns towards doing the exercise (e.g., no judging) | Social connection and support | 78.1 | 26.7 | 84.0 | 14.0 | | | 100.0 | 69.5 | 28.1 | 80.0 | | 5.0 | 100.0 |
| 2 | Set up clear and respectful group rules (e.g., taboo topics - particular topics that shouldn't be discussed within the group) | Social connection and support | 77.6 | 30.0 | 90.5 | 10.0 | | | 100.0 | 76.1 | 30.4 | 84.0 | | 10.0 | 100.0 |
| 3 | Make time to talk during the class, allowing people to share their stories, thoughts, concerns, and experiences | Social connection and support | 69.5 | 25.7 | 70.5 | 20.0 | | | 100.0 | 69.3 | 28.1 | 79.0 | | 9.0 | 100.0 |
| 4 | Refer to the group using collective language (e.g., "the team", "we", and "us") | Social connection and support / Inclusion | 60.3 | 29.3 | 62.5 | 10.0 | | | 100.0 | 55.6 | 37.3 | 60.0 | | 6.0 | 100.0 |
| 5 | Highlight the group's shared goal of achieving physical fitness, improved wellbeing, and a better quality of life | Goals | 69.7 | 31.6 | 79.0 | 5.0 | | | 100.0 | 76.0 | 27.1 | 84.5 | | 11.0 | 100.0 |
| 6 | Come up with a group name for the class reflecting on the group aim (i.e., what the class is for) | Novelty | 60.0 | 28.5 | 62.0 | 10.0 | | | 100.0 | 57.8 | 37.5 | 58.0 | | 7.0 | 100.0 |
|  | Impresarioship | | | | | | |  | | | | | | | |
| 1 | Create opportunity for people to interact outside of the class (e.g., discussion board, emails communication) | Social connection and support | 69.9 | 28.5 | 75.0 | 6.0 | | | 100.0 | 64.2 | 32.5 | 68.5 | | 4.0 | 100.0 |
| 2 | Organize a group chat on social media (e.g., a Facebook group) | Social connection and support | 64.8 | 29.6 | 74.5 | 4.0 | | | 100.0 | 64.3 | 33.2 | 71.5 | | 4.0 | 100.0 |
| 3 | Facilitate options to hang around immediately before or after the class (e.g., stay behind on zoom) | Social connection and support | 63.4 | 30.4 | 72.5 | 5.0 | | | 100.0 | 63.3 | 34.5 | 69.5 | | 4.0 | 100.0 |
| 4 | Ask the group to share their individual short-term and/or long-term goals | Goals | 71.2 | 30.0 | 81.5 | 1.0 | | | 100.0 | 74.4 | 27.4 | 84.5 | | 10.0 | 100.0 |
| 5 | Implement a structured tracking system (e.g., a scoreboard, spreadsheet, diagram) to measure individual and group progress | Goals | 67.9 | 24.5 | 71.0 | 25.0 | | | 100.0 | 73.4 | 25.7 | 81.0 | | 15.0 | 100.0 |
| 6 | Introduce weekly themes based on groups interests (e.g., grand-final week, managing fatigue) | Novelty | 65.9 | 29.2 | 71.0 | 10.0 | | | 100.0 | 58.2 | 31.1 | 59.0 | | 1.0 | 100.0 |
| 7 | Introduce motivational word of the week for the group to reflect on (e.g., strength, hope, peace, mindfulness) | Novelty | 62.9 | 30.9 | 65.5 | | 1.0 | | 100.0 | 64.3 | 32.5 | | 72.5 | 1.0 | 100.0 |
| 8 | Involve the group in music selection for class warm-ups and cool-downs | Novelty | 58.7 | 24.3 | 61.0 | 18.0 | | | 93.0 | 54.5 | 29.3 | 56.0 | | 9.0 | 100.0 |
| 9 | Introduce weekly challenges (e.g., take a photo of a bird while out for a walk) | Novelty | 57.6 | 29.5 | 56.5 | 1.0 | | | 95.0 | 60.8 | 29.5 | 64.0 | | 1.0 | 100.0 |
| 10 | Put up slides or content centred around the group that are visually relevant to the group aim or name | Novelty | 55.1 | 31.9 | 60.5 | 4.0 | | | 100.0 | 54.7 | 33.6 | 59.0 | | 1.0 | 100.0 |
|  | **Advancement** | | | | | | |  | | | | | | | |
| 1 | Recognize people's commitment to the class and provide group support as an encouragement for that commitment (e.g., cheer for each other’s accomplishments) | Social support and connection | 67.5 | 25.0 | 73.0 | 19.0 | | | 100.0 | 64.6 | 32.4 | 72.0 | | 5.0 | 100.0 |
| 2 | Work with the group to identify their aims/goals as a group | Goals | 70.5 | 28.0 | 82.5 | 15.0 | | | 100.0 | 65.8 | 32.9 | 75.5 | | 7.0 | 100.0 |
| 3 | Put together a video for the group detailing the exercise and show how to do the exercise correctly | Novelty | 87.7 | 19.5 | 92.5 | 22.0 | | | 100.0 | 81.3 | 26.0 | 87.0 | | 12.0 | 100.0 |
| 4 | Structure the exercise to match with individual's needs and physical circumstances | Individualisation | 91.5 | 9.2 | 95.0 | 75.0 | | | 100.0 | 88.2 | 15.2 | 94.0 | | 55.0 | 100.0 |
| 5 | Design the program based on group needs (e.g., always having a go slow option or easier alternative for each exercise) | Individualisation | 89.3 | 12.2 | 93.0 | 60.0 | | | 100.0 | 85.7 | 14.5 | 89.5 | | 55.0 | 100.0 |
| 6 | Deliver the class in short exercise segments, allowing people to have breaks and/or a shorter session if needed | Individualisation | 74.7 | 20.4 | 82.5 | 34.0 | | | 100.0 | 75.3 | 27.5 | 85.0 | | 10.0 | 100.0 |
| 7 | Do a survey prior to draw on the group's common grounds, understand their needs and interests | Individualisation | 70.9 | 23.7 | 78.5 | 15.0 | | | 100.0 | 68.4 | 29.1 | 76.0 | | 10.0 | 100.0 |
| 8 | Set up personalized goals for individuals based on each person's physical ability, fitness, and/or treatment level | Individualisation | 89.3 | 16 | 99.5 | 56 | | | 100 | 91.9 | 12.2 | 97.5 | | 62 | 100 |
|  | Not a clear example of identity leadership |  |  |  |  |  | | |  |  |  |  | |  |  |
| 1 | Pair up people with similar fitness, treatment level and/or interests (e.g., buddy system) | Social connection and support | 73.3 | 22.0 | 77.5 | 20.0 | | | 100.0 | 74.5 | 29.3 | 88.0 | | 11.0 | 100.0 |
| 2 | Conduct baseline and follow-up assessments (e.g., physical ability testing) | Individualisation | 88.2 | 15.5 | 97.0 | 51.0 | | | 100.0 | 82.5 | 22.7 | 90.5 | | 26.0 | 100.0 |
| 3 | Get to know how people are feeling on a particular day (e.g., traffic light system: red/yellow/green – well/soso/unwell) and adapt the exercise based on that | Individualisation | 84.4 | 16.3 | 88.5 | 50.0 | | | 100.0 | 81.9 | 24.3 | 89.0 | | 10.0 | 100.0 |
| 4 | Get to know people in the group individually (e.g., their limitations, needs) before starting to work with them | Individualisation | 83.5 | 17.4 | 91.5 | 51.0 | | | 100.0 | 83.1 | 14.6 | 84.5 | | 59.0 | 100.0 |
| 5 | Monitor individual and group progress closely and step in when needed to give feedback | Individualisation, Goals | 83.0 | 16.9 | 84.0 | 49.0 | | | 100.0 | 85.3 | 15.5 | 89.0 | | 43.0 | 100.0 |
